# Supplementary material for: Reforming teaching methods by integrating dental theory with clinical practice for dental students
Source: PeerJ. 2020 Feb 7;8:e8477. doi: 10.7717/peerj.8477 (PMC7008813; doi:10.7717/peerj.8477)
Supplement: Supplemental Information 2 [file peerj-08-8477-s002.xlsx]

## Sheet: Sheet1
	How did you find the value of this teaching method, as compared with that of the traditional teaching?
	Much more		1		A little more	1	Almost the same		1
			1			1
			1			1
			1			1
			1
			1
			1
			1
			1
			1
			1
			1
			1
			1
			1
			1
			1
			1
			1
			1
			1
			1
			1
			1
			1
