# Supplementary material for: Reforming teaching methods by integrating dental theory with clinical practice for dental students
Source: PeerJ. 2020 Feb 7;8:e8477. doi: 10.7717/peerj.8477 (PMC7008813; doi:10.7717/peerj.8477)
Supplement: Supplemental Information 3 [file peerj-08-8477-s003.xlsx]

## Sheet: Sheet1
	Paper examination results of the clinical-simulation PBL training group and the control group.
	1. Whether the appearance of the students meets the hygiene requirements. For example, whether the hat, mask, and glove are worn correctly.
	2. Whether the students' attitude is pleasant when they face patients, and whether the speed of their speech is appropriate.
	3. Whether the inquiry is detailed, whether the purpose and requirements of patients are understood, and whether the patients' urgent issues to be addressed and comprehensive history, including the history, drug allergies, etc., are collected.
	4. When conducting oral preliminary examination, whether compliance with aseptic conditions is satisfactory, whether the mouth pulling action is gentle, and whether the chair position is appropriate.
	5. Whether the oral examination is complete, comprehensive, includes a related repair inspection, includes the abutments, the gaps of missing teeth, the alveolar ridge and mucosa, occlusion, etc., and examination of other dental, periodontal, and mucosal conditions
	6. Whether the auxiliary check is reasonable and comprehensive, whether the diagnosis of oral diseases is accurate and complete, and whether a reasonable differential diagnosis is conducted.
	7. Whether the preliminary diagnosis is correct, whether the explanation of the oral condition is sufficiently detailed, and whether several possible treatment plans are developed, including any necessary collaborative treatments involving other departments.
	8. Whether a reasonable treatment plan has been determined and described in detail to the patients, including the desired treatment time, costs, possible problems, etc.
	9. Whether the case history record is comprehensive and standardized.
	10. Whether the patients' recognition and satisfaction are received.
			Average score	pass rate(%)	excellent rate(%)
		PBL group	82.8	90	40
		Control group	74.33	70	23.33
