# Supplementary material for: Reforming teaching methods by integrating dental theory with clinical practice for dental students
Source: PeerJ. 2020 Feb 7;8:e8477. doi: 10.7717/peerj.8477 (PMC7008813; doi:10.7717/peerj.8477)
Supplement: Supplemental Information 4 [file peerj-08-8477-s004.xlsx]

## Sheet: Sheet1
	Student responses to the questions about the change in their general abilities or skills after the clinical-simulation PBL training
	1	Have your ability in independently searching literatures increased?
		Obviously	24	A little	5	Hardly	1
	2	Have your comprehensive and logical analysis skills increased?
		Obviously	26
		A little	4
		Hardly	0
	3	Have your teamwork ability increased?
		Obviously	25
		A little	3
		Hardly	2
	4	Have your curiosity and exploratory desire of professional knowledge risen?
		Obviously	22
		A little	5
		Hardly	3
