# Supplementary material for: Reforming teaching methods by integrating dental theory with clinical practice for dental students
Source: PeerJ. 2020 Feb 7;8:e8477. doi: 10.7717/peerj.8477 (PMC7008813; doi:10.7717/peerj.8477)
Supplement: Supplemental Information 5 [file peerj-08-8477-s005.xlsx]

## Sheet: Sheet1
	Questionnaire on students' perceptions of teaching methods.
1	Do you like this teaching method?
	Yes	32	No	1
2	Is this method efficient for the use of time?
	Yes	33	No	2
3	Does this teaching method help to enhance your problem-solving confidence?
	Yes	26	No	4
4	Does this teaching method help to increase your interest in prosthodontics?
	Yes	29	No	3
5	Does this teaching method help you with understanding the theoretical knowledge of prosthodontics?
	Yes	27	No	5
6	Would you introduce this teaching method to others?
	Yes	30	No	2
