# Supplementary material for: Reforming teaching methods by integrating dental theory with clinical practice for dental students
Source: PeerJ. 2020 Feb 7;8:e8477. doi: 10.7717/peerj.8477 (PMC7008813; doi:10.7717/peerj.8477)
Supplement: Supplemental Information 6 [file peerj-08-8477-s006.xlsx]

## Sheet: Sheet1
	Questionnaire on the treatment of dental disease and changes in communication skills with patients after clinical simulation of PBL training
	1	Have your ability in grasping indications for repair increased?
		Obviously	23	A little	5	Hardly	4
	2	Have your ability in correctly diagnosing the diseases increased?
		Obviously	22	A little	6	Hardly	2
	3	Have your ability in developing the treatment plans increased?
		Obviously	20	A little	7	Hardly	3
	4	Have your ability in quickly and accurately grasping the patient’s condition increased?
		Obviously	21	A little	4	Hardly	5
	5	Have your ability in communicating with patients increased?
		Obviously	19	A little	6	Hardly	4
	6	Have your understanding patients improved?
		Obviously	20	A little	6	Hardly	4
